# Supplementary material for: Global Trends and Factors Associated with the Illegal Killing of Elephants: A Hierarchical Bayesian Analysis of Carcass Encounter Data
Source: PLoS One. 2011 Sep 2;6(9):e24165. doi: 10.1371/journal.pone.0024165 (PMC3166301; doi:10.1371/journal.pone.0024165)
Supplement: Table S1 — Carcass count data. The number of illegally killed carcasses (total number of carcasses) found at each site in each year. Site and country codes are provided. (XLS) [file pone.0024165.s010.xls]

## Sheet: Sheet1
Subregion	Country		Site		Year
	Code	Name	Code	Name	2002		2003		2004		2005		2006		2007		2008		2009		Total
Asia	bd	Bangladesh	CHU	Chunati									0	1	0	1	0	1	0	1	0	4
	cn	China	XBN	Xishuangbanna									0	1							0	1
	id	Indonesia	WAY	Way Kambas									0	1							0	1
	in	India	CHR	Chirang-Ripu			0	1	0	2					0	1	0	8	0	5	0	17
			DEO	Deomali									0	2							0	2
			DHG	Dihing Patkai					1	2	0	1	0	1	0	3	1	5	0	3	2	15
			EDO	Eastern Dooars			0	4	0	12	1	8			0	15	1	15	0	2	2	56
			GRO	Garo Hills			0	6	1	10	0	2	0	4	1	11	1	6	3	8	6	47
			MBJ	Mayurbhanji					0	12	2	17	0	1							2	30
			MYS	Mysore							4	30	1	3							5	33
			SVK	Shivalik							0	2									0	2
			WYD	Wayanad					0	2	1	8									1	10
	kh	Cambodia	MKR	Mondulkiri									0	1							0	1
	la	Lao PDR	NAK	Nakai Nam Theum			1	1							0	1					1	2
	mm	Myanmar	ALW	Alaungdaw Kathapa									2	2					1	1	3	3
	my	Malaysia	KLU	Kluang											0	1			1	2	1	3
	th	Thailand	SKP	Salakphra							0	1									0	1
	vn	Viet Nam	CTN	Cat Tien															12	12	12	12
Central Africa	cd	D.R. Congo	GAR	Garamba			110	114	176	197	77	86	32	34	7	14	4	4	6	6	412	455
			OKP	Okapi			20	20	9	10	21	22	5	5	11	11	2	3	16	16	84	87
			SAL	Salonga			0	2	36	56	1	4							2	9	39	71
			VIR	Virunga							4	9	1	3	0	15	63	63	11	16	79	106
	cf	C.A. Republic	BGS	Bangassou			3	3	8	8											11	11
			DZA	Dzanga-Sangha							8	9	1	2	1	2	17	27	3	10	30	50
			SGB	Sangba			1	10	0	1							8	8	3	3	12	22
	cg	Congo	NDK	Nouabale-Ndoki			5	8	4	14	3	4	0	5	0	1	1	4	0	3	13	39
			ODZ	Odzala			2	38	19	36	0	73	0	1	35	36	9	17	3	3	68	204
	cm	Cameroon	BBK	Boumba-Bek	0	5	13	19	5	7	3	3	0	12	0	1	0	1	3	12	24	60
	cm	Cameroon	WAZ	Waza			1	3	1	2	1	2	1	3	0	1	0	2	1	1	5	14
	ga	Gabon	LOP	Lopé			4	7	1	4			0	1			0	1	2	3	7	16
			MKB	Minkébé			8	11	12	13	3	6					4	4	3	4	30	38
	td	Chad	ZAK	Zakouma			22	34	30	35	3	11	40	60	155	160	81	86	12	15	343	401
East Africa	er	Eritrea	GSH	Gash-Setit	0	3	1	3	0	1			1	7	2	4	2	5	3	6	9	29
	ke	Kenya	EGK	Mount Elgon			6	7	5	7	0	1	2	5	1	2	1	2	10	12	25	36
			MRU	Meru									7	14	3	11	5	13	26	48	41	86
			SBR	Samburu Laikipia	60	159	36	195	40	128	27	160	13	96	23	97	141	278	107	416	447	1529
			TSV	Tsavo			18	82	19	65	17	60	15	88	11	56	26	79	61	363	167	793
	rw	Rwanda	AKG	Akagera									0	1							0	1
	tz	Tanzania	KTV	Katavi			9	12	15	20	3	6	2	2	2	2	9	9	4	5	44	56
			RHR	Ruaha Rungwa			1	10	1	6	10	15	8	9	0	2	2	3	0	2	22	47
			SEL	Selous Mikumi			2	9	2	11					43	103	53	90	49	73	149	286
			TGR	Tarangire			1	7	0	11			1	4	1	5	2	5	13	15	18	47
	ug	Uganda	MCH	Murchison Falls			10	10	1	2			2	2	1	2	1	2	3	5	18	23
Southern Africa	bw	Botswana	CHO	Chobe			0	59	5	73	7	153	11	111	14	101	4	113	14	79	55	689
	mz	Mozambique	MAG	Cabora Bassa	0	1	1	3	2	2											3	6
			NIA	Niassa					0	14			1	3			14	16			15	33
	na	Namibia	CAP	Caprivi	0	1	2	8	0	6	1	4	2	5	0	5			0	8	5	37
			ETO	Etosha	0	24	0	18	0	4	0	25	0	15	0	25	0	14	0	5	0	130
	za	South Africa	KRU	Kruger	0	1	0	2	0	18	0	35	0	51	1	34	0	18	1	18	2	177
	zm	Zambia	SLW	South Luangwa	1	4	5	8	15	23	1	4	27	35	0	11	7	8	6	14	62	107
	zw	Zimbabwe	CHE	Chewore	7	19	3	10	3	14	0	20	2	17	11	14	1	13	7	12	34	119
			NYA	Nyami Nyami	2	3	2	7	9	11	5	6	2	3	5	10	18	20	23	27	66	87
West Africa	bf	Burkina Faso	NAZ	Nazinga	0	1			0	2	0	3	0	1			4	4	1	1	5	12
			WBF	W du Burkina	0	1			0	1							6	6	2	2	8	10
	bj	Benin	PDJ	Pendjari	0	1	1	2	1	3							0	1	7	8	9	15
			WBJ	W du Bénin	0	1	0	1	0	3									0	1	0	6
	ci	Côte d'Ivoire	MAR	Marahoué											8	8	1	1	2	2	11	11
			TAI	Taï					2	2											2	2
	gh	Ghana	KAK	Kakum	1	2	0	6	0	5					0	1	1	1	1	1	3	16
			MOL	Mole	0	1	1	2	2	8	3	3			4	5	2	2			12	21
	gn	Guinea	ZIA	Ziama			1	1	2	2					1	1	4	4	11	11	19	19
	lr	Liberia	SAP	Sapo											1	1	1	1	3	3	5	5
	ml	Mali	GOU	Gourma	0	3	0	1	0	1	0	2	0	3	0	2	0	2	1	4	1	18
	ne	Niger	WNE	W du Niger	1	1	1	4	2	2									2	2	6	9
	ng	Nigeria	YKR	Yankari	0	6	1	4	3	5	0	2									4	17
