# Supplementary material for: Global Trends and Factors Associated with the Illegal Killing of Elephants: A Hierarchical Bayesian Analysis of Carcass Encounter Data
Source: PLoS One. 2011 Sep 2;6(9):e24165. doi: 10.1371/journal.pone.0024165 (PMC3166301; doi:10.1371/journal.pone.0024165)
Supplement: Table S2 — Site data. Site-level covariates for each site. (XLS) [file pone.0024165.s011.xls]

## Sheet: Site data
Site	ln(area)	ln(ele)	ln(dens)	ecosys	ln(people)	ftprint	conseff
AKG	6.98564	3.3322	-3.65344	544.091	4.06165	26.8055	0.682907
ALW	7.38088	6.9344	-0.446482	469.7	3.24921	21.2833	0.3
BBK	7.77612	5.76205	-2.01406	980.337	0.207014	10.2328	0.3
BGS	9.39358	6.21461	-3.17897	951.432	1.29746	12.6772	0.3
CAP	7.66763	8.40402	0.736398	323.281	0.270027	11.3337	0.824865
CHE	8.09895	9.07898	0.980031	526.177	2.15292	23.1835	0.714585
CHO	9.40878	10.6156	1.20685	308.768	0.239017	11.2902	0.794587
CHR	7.86327	6.69332	-1.16994	566.117	5.57879	32.9667	0.3
CHU	4.3515	2.77259	-1.57891	418.927	6.33573	29.9235	0.3
CTN	6.60935	2.30259	-4.30676	895.185	3.75747	28.5387	0.3
DEO	6.80239	5.01064	-1.79176	485.995	4.885	29.4416	0.3
DHG	6.84268	6.12468	-0.718	494.246	5.64827	36.9627	0.3
DZA	7.84542	6.76734	-1.07807	1009.65	1.62728	13.245	0.800692
EDO	6.88551	5.10595	-1.77956	430.852	5.77731	37.2362	0.3
EGK	6.98749	4.93447	-2.05302	726.519	5.80281	29.1787	0.3
ETO	9.82828	7.629	-2.19928	128.501	0.0953102	7.22821	0.774719
GAR	8.61704	8.75684	0.139801	746.54	2.40785	19.2724	0.608929
GOU	10.3689	5.84064	-4.52821	66.9918	1.32972	14.6828	1
GRO	8.16052	6.77765	-1.38287	463.663	5.43612	21.2412	0.3
GSH	8.57073	4.64439	-3.92634	167.912	3.0121	31.061	0.3
KAK	5.90263	5.09987	-0.802767	470.938	4.63938	29.3687	0.818935
KLU	7.82405	4.90527	-2.91877	934.482	3.07823	25.3053	0.6
KRU	9.88451	9.51584	-0.368671	325.158	2.94864	15.0113	1
KTV	9.36538	8.73504	-0.630334	632.612	2.20276	20.4455	0.76158
LOP	8.40872	7.76217	-0.646546	704.878	0.198851	4.89703	0.739636
MAG	8.7529	7.44892	-1.30398	523.437	2.195	25.1727	0.680311
MAR	6.91771	5.0689	-1.8488	706.84	4.07838	29.0816	0.746829
MBJ	8.07527	6.23832	-1.83695	373.694	5.22489	32.5799	0.3
MCH	8.30992	6.24611	-2.06382	814.336	3.80064	23.7396	0.44829
MKB	8.90082	9.95561	1.05478	872.309	-0.84397	6.96821	0.726239
MKR	8.36497	4.75359	-3.61138	677.811	1.90806	15.5448	0.613788
MOL	8.41272	5.99396	-2.41876	405.642	2.20497	22.4615	1
MRU	6.78446	5.6058	-1.17865	331.672	3.62274	15.4671	1
MYS	8.81344	8.67214	-0.141295	526.702	5.26688	27.5554	0.3
NAK	6.89668	4.8828	-2.01388	9.99e-07	2.793	21.7871	0.89
NAZ	8.7149	6.40192	-2.31298	321.407	3.5427	28.4587	1
NDK	8.80387	8.01698	-0.786897	1009.39	-0.820981	4.52518	0.800692
NIA	10.6599	9.37865	-1.28124	593.574	1.05431	7.22073	0.837083
NYA	8.07838	8.17611	0.0977322	402.659	2.10413	29.1193	0.778617
ODZ	9.51377	9.51377	0	927.654	-0.0202027	8.76383	0.806411
OKP	8.73376	8.24486	-0.488896	1061.25	2.44669	16.9803	0.754512
PDJ	7.94697	6.6695	-1.27747	333.58	2.87807	25.6787	1
QEZ	7.67229	7.99261	0.320314	662.403	5.09099	29.0992	0.667152
RHR	10.4932	10.0901	-0.403153	510.442	1.84055	23.8307	0.80419
SAL	10.0033	7.07834	-2.92499	925.493	1.20297	8.60304	0.631563
SAP	7.16395	5.7462	-1.41774	586.492	1.95303	18.4396	0.507293
SBR	10.24	8.95338	-1.28658	336.652	3.28803	19.6106	1
SEL	11.3028	11.162	-0.140738	648.648	2.39971	17.6115	0.739178
SGB	10.5246	6.72143	-3.80317	606.084	-0.248461	6.44274	0.50702
SKP	6.7546	4.94164	-1.81296	561.254	3.2951	29.3136	0.3
SLW	9.04169	8.40268	-0.639005	567.221	1.80171	15.5895	0.745871
SVK	8.59508	7.36645	-1.22863	405.26	5.71287	35.7947	0.3
TAI	8.76561	3.97029	-4.79532	811.03	2.95543	22.8425	0.670365
TGR	9.15208	7.17166	-1.98042	491.765	3.29064	20.855	1
TSV	10.6187	9.367	-1.25166	311.955	3.22883	15.3059	1
VIR	7.86211	5.8522	-2.00991	650.44	5.18055	29.2473	0.3
WAY	7.11883	5.19296	-1.92587	655.956	5.31321	23.5382	0.536377
WAZ	7.43838	6.20658	-1.23181	255.854	3.34709	29.5392	1
WBF	7.78821	6.60665	-1.18156	285.288	2.54318	21.9166	1
WBJ	8.67795	4.02535	-4.6526	305.861	2.90032	24.8429	1
WNE	7.73805	4.44265	-3.2954	244.878	2.94339	34.7368	1
WYD	7.09008	6.86797	-0.222102	453.627	5.49688	28.4363	0.3
XBN	7.78322	5.10595	-2.67728	671.034	3.71601	25.8001	0.3
YKR	8.07838	5.8522	-2.22618	370.974	3.59319	29.723	1
ZAK	8.12267	6.45677	-1.6659	343.566	1.17557	18.0292	1
ZIA	6.1203	5.36598	-0.754321	934.407	3.32899	32.7027	0.730375
